# Supplementary material for: Study protocol: identifying and delivering point-of-care information to improve care coordination
Source: Springer Nature journal article supplement (doi:10.1186/s13012-015-0335-9), 2015-10-19
Supplement: MOESM2 [file 9773208]

**Additional file 2 – ProMES indicator information form**

Facilitator Name:

PACT Lead:

|        |  |
|--------|--|
| Obj    |  |
| Name   |  |
| Number |  |

**Indicator 1**

|                        |  |             |  |
|------------------------|--|-------------|--|
| Name:                  |  |             |  |
| Rationale:             |  |             |  |
| Indicator Calculation: |  |             |  |
| Data Source:           |  |             |  |
| Assignments:           |  |             |  |
| Data Collection:       |  | Data Entry: |  |

**Indicator 2**

|                        |  |             |  |
|------------------------|--|-------------|--|
| Name:                  |  |             |  |
| Rationale:             |  |             |  |
| Indicator Calculation: |  |             |  |
| Data Source:           |  |             |  |
| Designates:            |  |             |  |
| Data Collection:       |  | Data Entry: |  |
